# Supplementary material for: Developmental endothelial locus-1 protects from hypertension-induced cardiovascular remodeling via immunomodulation
Source: JCI journal article supplement (doi:10.1172/jci126155), 2022-02-08

**Supplemental Figure 1. EC-Del1 mice have low inflammatory profile in aorta.** mRNA levels of aortic fibrotic (A-C), pro- (E-M) and anti-inflammatory (N) markers. mRNA levels of Del-1 (O) (n=6-8 mice per group for all experiments). Data represent mean  $\pm$  SEM. \* $P$ <0.05, \*\* $P$ <0.01 analyzed by two-way ANOVA with Bonferroni post hoc test to adjust for multiple comparisons.

**Supplemental Figure 2. EC-Del1 mice have low inflammatory profile in heart.** mRNA levels of cardiac fibrotic (A-B), hypertrophic (C-F), pro- (G-M) and anti-inflammatory (N) markers. mRNA levels of Del-1 (O) (n=6-8 mice per group for all experiments). Data represent mean  $\pm$  SEM. \* $P$ <0.05, \*\* $P$ <0.01 analyzed by two-way ANOVA with Bonferroni post hoc test to adjust for multiple comparisons.

**Supplemental Figure 3. DEL-1-Fc treated mice have low inflammatory profile in aorta.** mRNA levels of aortic fibrotic (A-C), pro- (D-K) and anti-inflammatory (L) markers (n=6 mice per group). Data represent mean  $\pm$  SEM. \* $P$ <0.05, \*\* $P$ <0.01 analyzed by one-way ANOVA with Bonferroni post hoc test to adjust for multiple comparisons.

**Supplemental Figure 4. DEL-1-Fc treated mice have low inflammatory profile in aorta.** mRNA or protein levels of cardiac fibrotic (A-B), hypertrophic (C-F), pro- (G-K) and anti-inflammatory (L) markers (n=6 mice per group). Data represent mean  $\pm$  SEM. \* $P$ <0.05, \*\* $P$ <0.01 analyzed by one-way ANOVA with Bonferroni post hoc test to adjust for multiple comparisons.

**Supplemental Figure 5. DEL-1-Fc, but not DEL-1-RGE-Fc treated mice have low inflammatory profile in aorta.** mRNA or protein levels of aortic fibrotic (A-C), pro- (D-K) and anti-inflammatory (L) markers (n=6 mice per group). Data are means  $\pm$  SE. \* $P$ <0.05, \*\* $P$ <0.01 analyzed by one-way ANOVA with Bonferroni post hoc test to adjust for multiple comparisons.

**Supplemental Figure 6. DEL-1-Fc, but not DEL-1-RGE-Fc treated mice have low inflammatory profile in heart.** mRNA or protein levels of cardiac fibrotic (A-B), hypertrophic (C-F), pro- (G-K) and anti-inflammatory (L) markers (n=6 mice per group). Data are means  $\pm$  SE. \* $P$ <0.05, \*\* $P$ <0.01 analyzed by one-way ANOVA with Bonferroni post hoc test to adjust for multiple comparisons.

Supplemental Figure 1

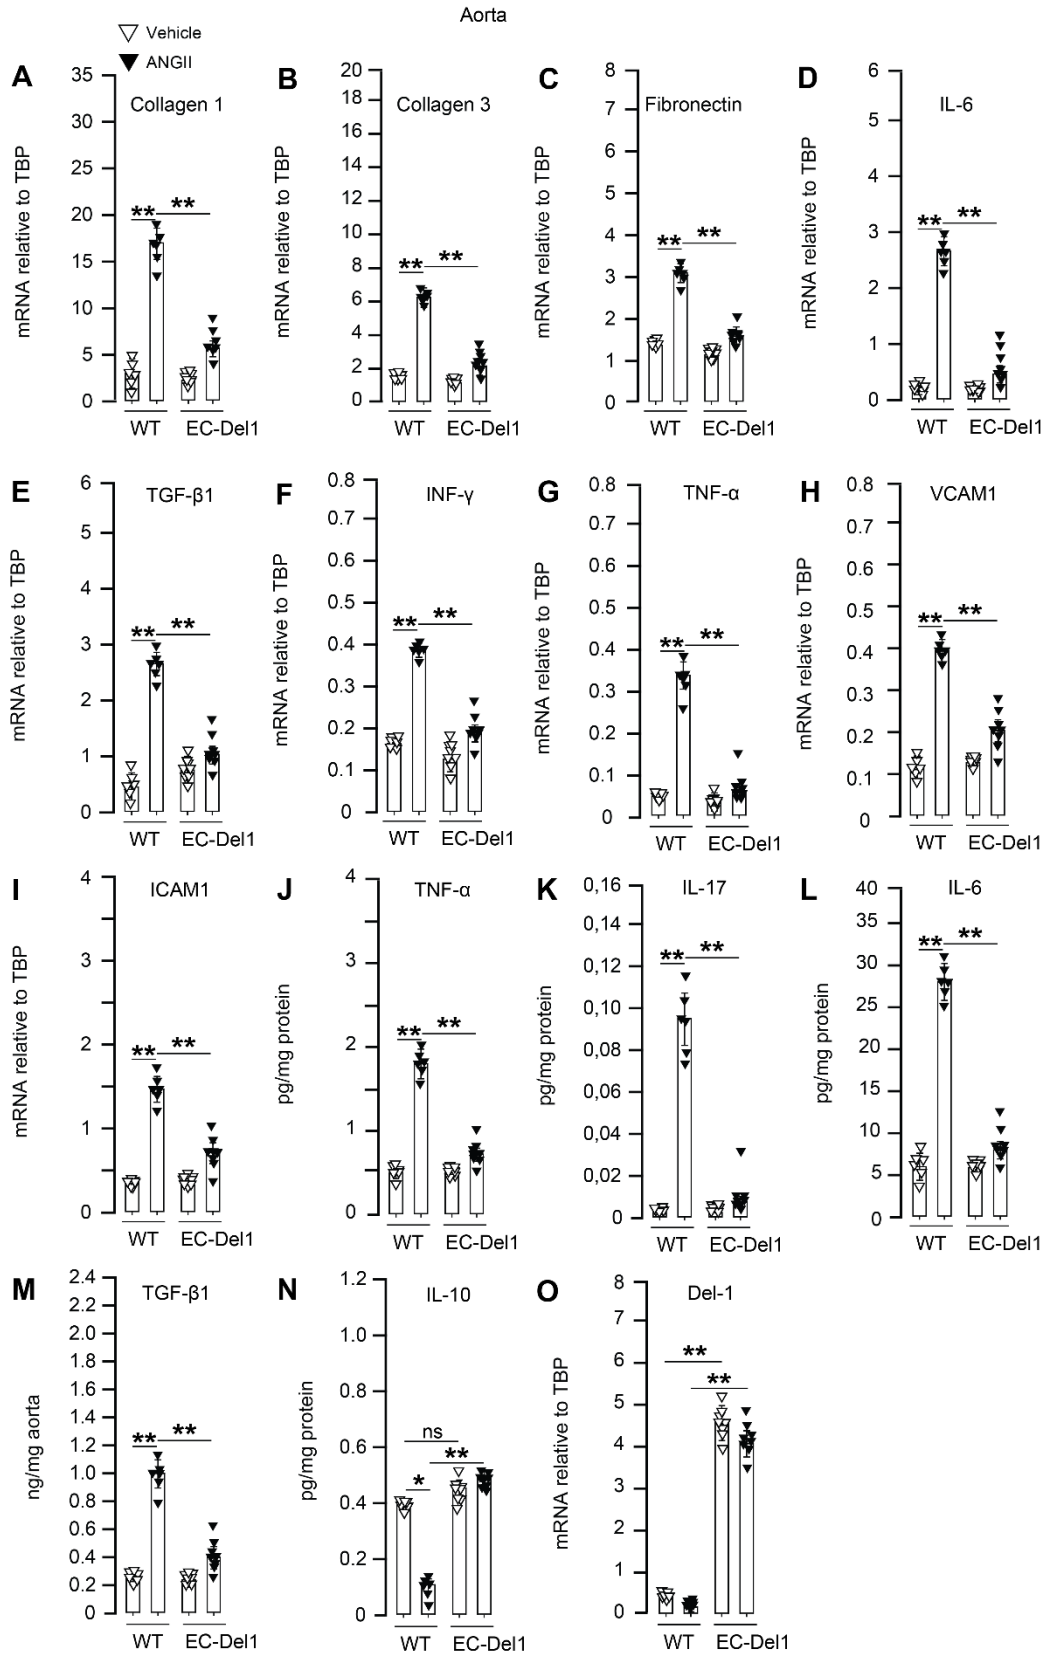

Supplemental Figure 2

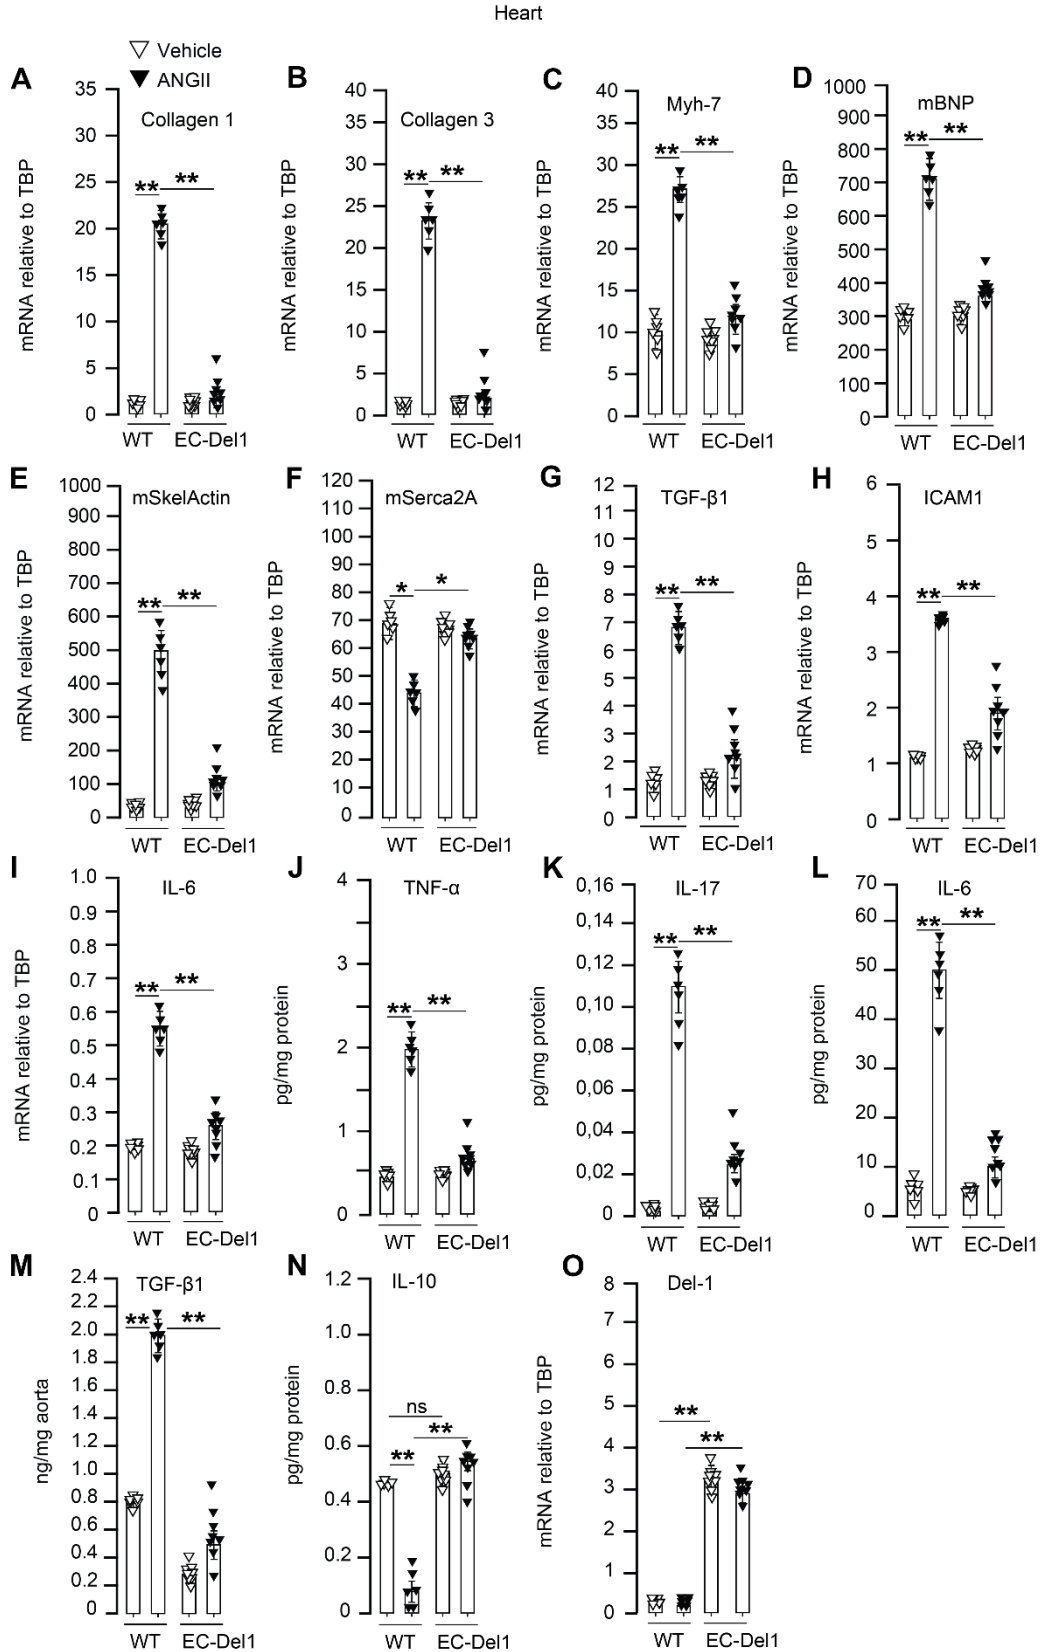

Supplemental Figure 3

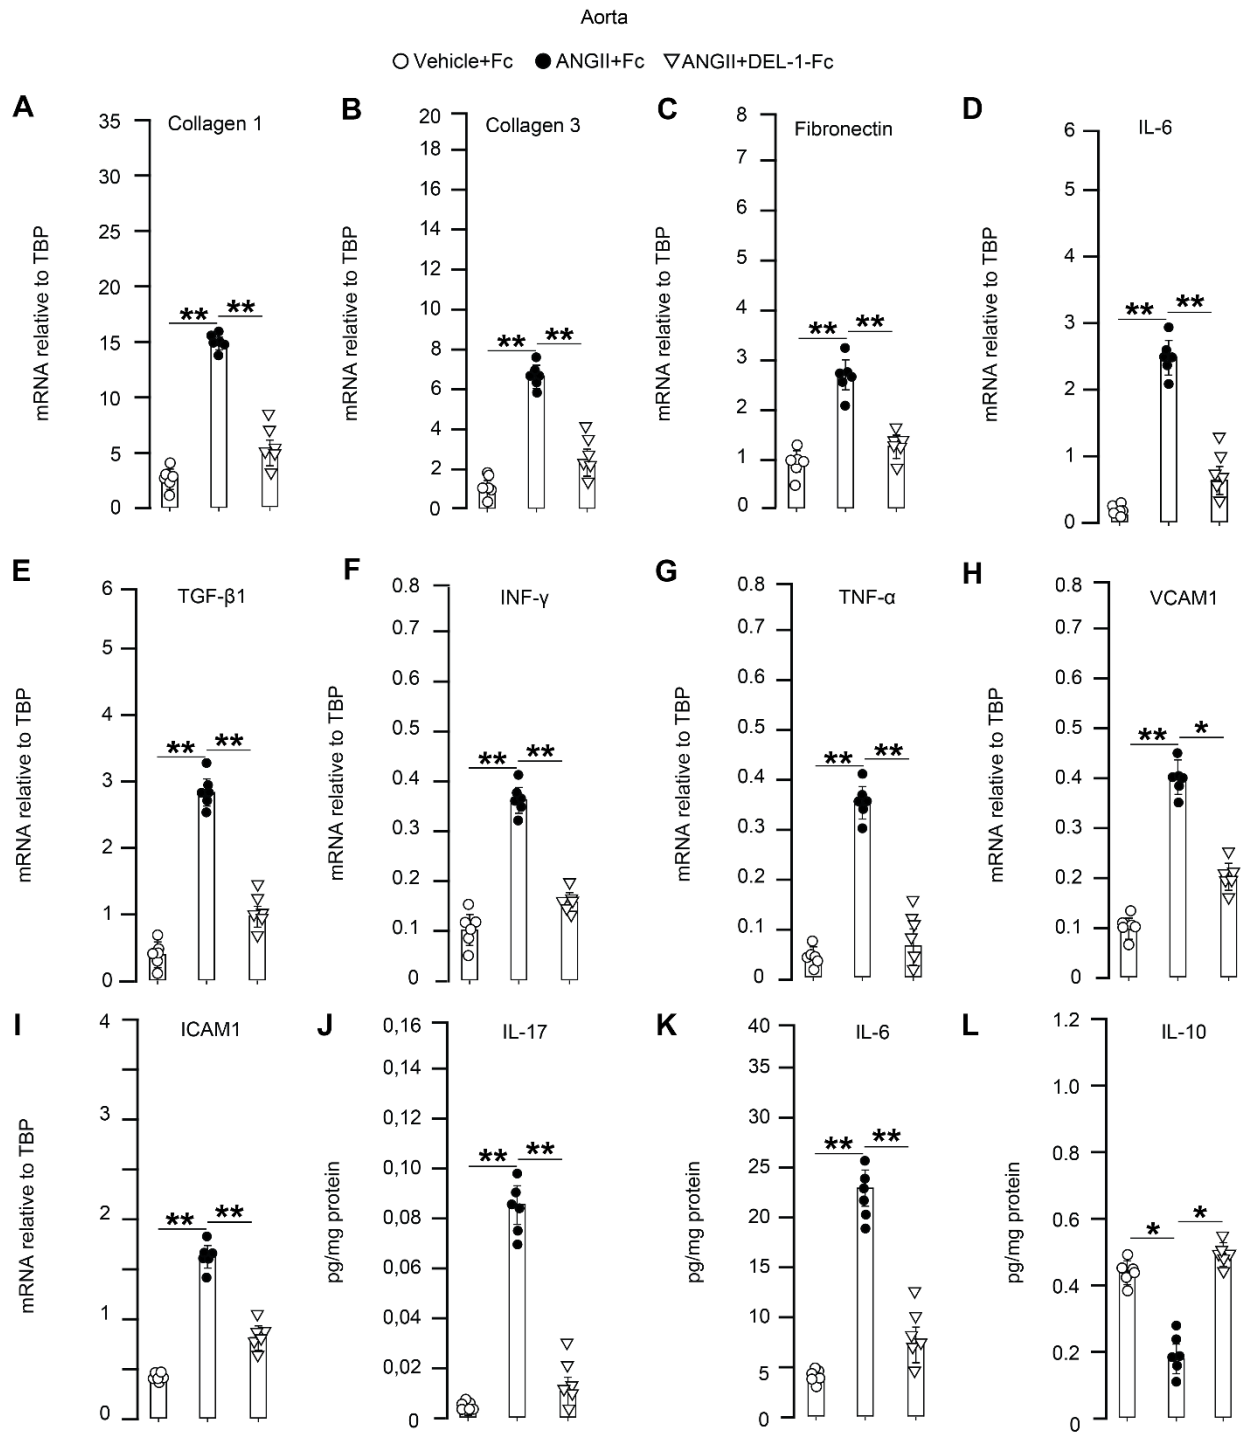

Supplemental Figure 4

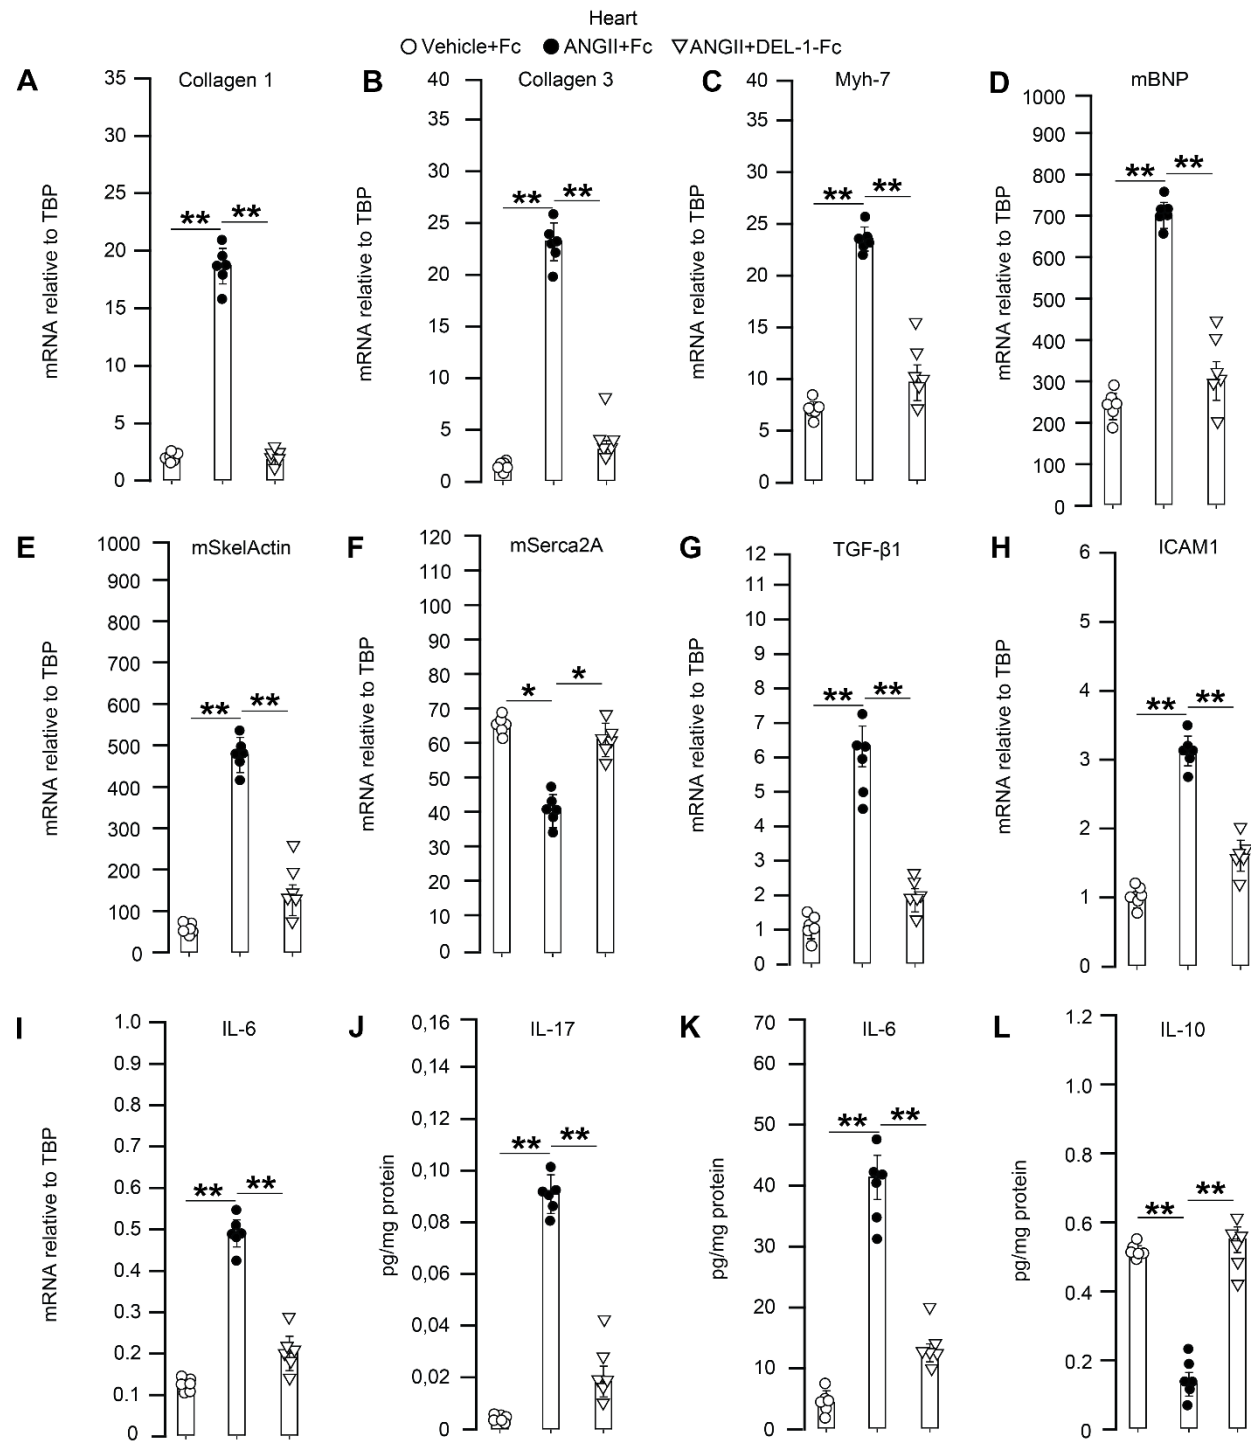

Supplemental Figure 5

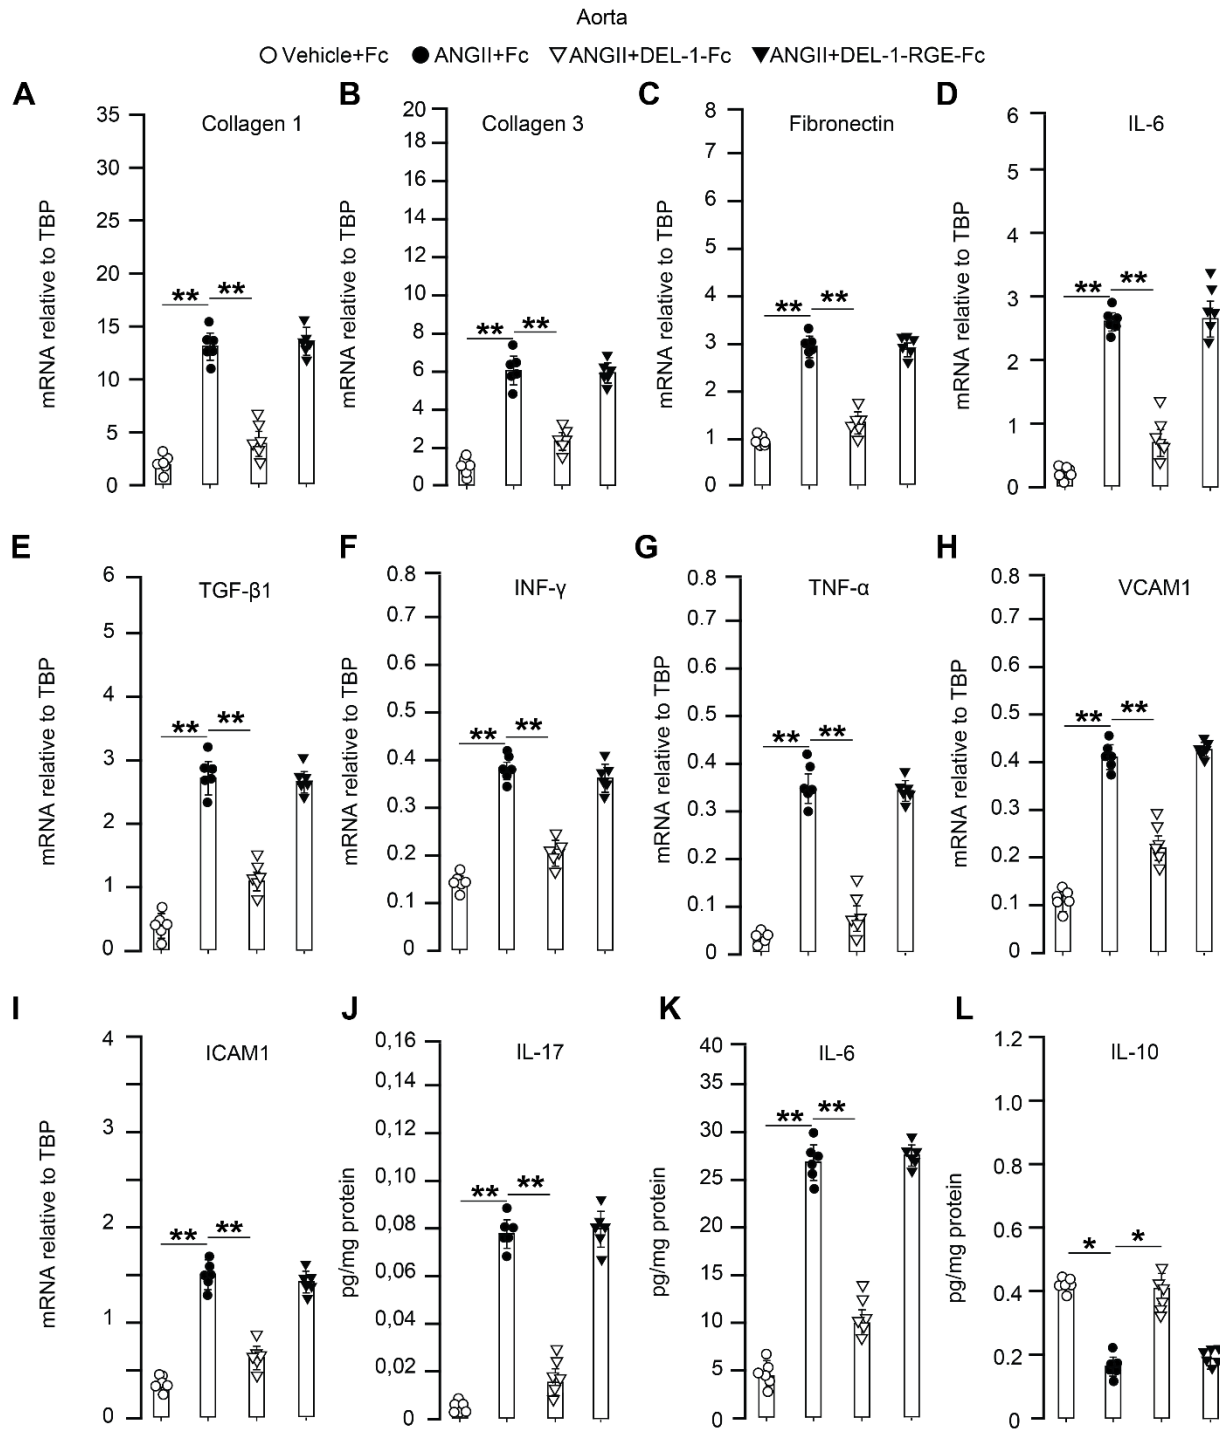

Supplemental Figure 6

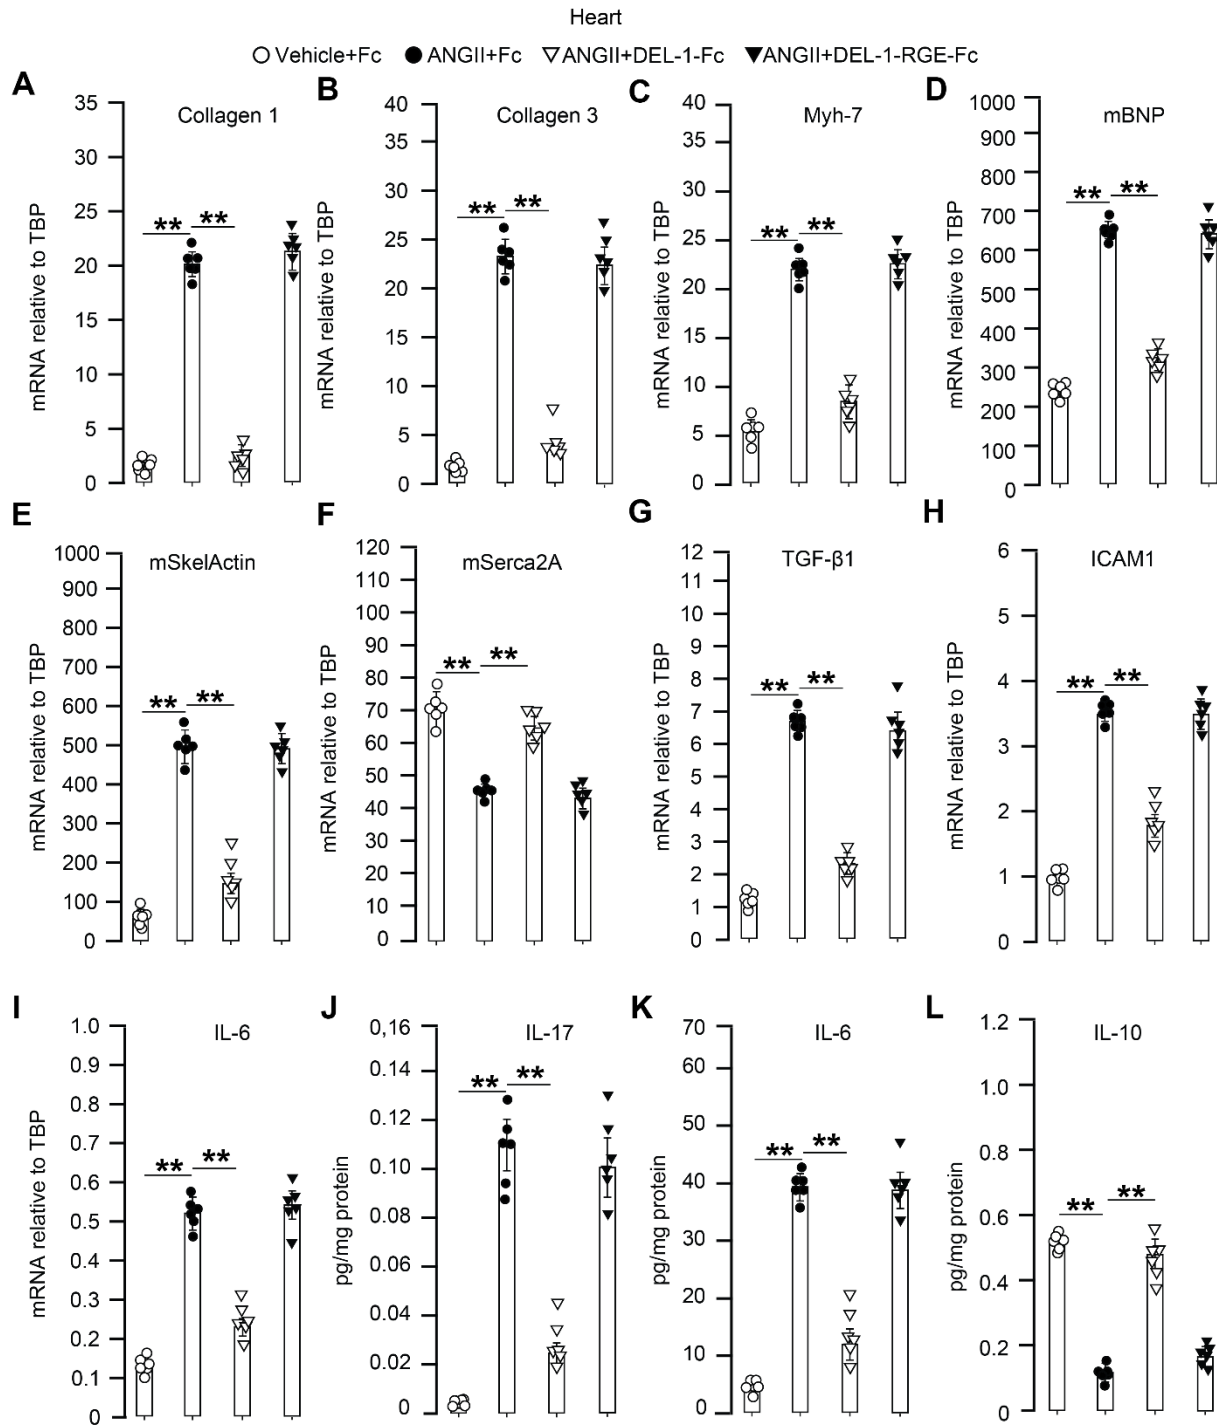

Supplement: sd1 [file 1]
